# Supplementary material for: Personal Electronic Records of Medications (PERMs) for Medication Reconciliation at Care Transitions: A Rapid Realist Review
Source: Research Square preprint supplement (doi:10.21203/rs.3.rs-289394/v1), 2021-03-15
Supplement: Supplementary file [file 4eb21307ca3aad580a47ea65.pdf]

#### **Additional File 4: Themes identified by the Reference Panel**

The following 14 themes were developed from the feedback provided by the Reference panel:

1. Input from stakeholders at all stages
2. Sources of personal data and PERM data
3. Content of PERM
4. Interoperability
5. Workflow / Communication
6. Trust in the information
7. Safety and Security of data
8. Budget for all stages
9. User factors i.e. skills, education, background
10. Training
11. Design elements including Layout, Terminology, Use of Warnings/ Decision support
12. Existing electronic records/systems in place
13. Relevant Governance / Policies in existence
14. User access to PERM

Additional Themes added after brainstorming session before extraction began:

15. Usability
16. Issues affecting use of PERM
17. Awareness of others' role and SOP Changing roles of HCP in MedRec
18. Patient Tools
19. Patient's rights
20. Technical Issues

These themes helped to develop the focus, given the time available, of what evidence we would look for in the included articles while still keeping an open mind for other evidence not identified by the panel.
