# Supplementary material for: Personal Electronic Records of Medications (PERMs) for Medication Reconciliation at Care Transitions: A Rapid Realist Review
Source: Research Square preprint supplement (doi:10.21203/rs.3.rs-289394/v1), 2021-03-15
Supplement: Supplementary file [file 5bc1919f6fbc2966c22edab4.pdf]

# Additional File 7: The context, mechanism and outcome configurations

| Engage Stakeholders                                                                                          |                                                                                 |                                                                                          |                                                                                                |                                                 |
|--------------------------------------------------------------------------------------------------------------|---------------------------------------------------------------------------------|------------------------------------------------------------------------------------------|------------------------------------------------------------------------------------------------|-------------------------------------------------|
| If                                                                                                           | Context                                                                         | Mechanism                                                                                | Outcome                                                                                        | Sources                                         |
| stakeholders including all user groups, at all stages of the design, implementation and use of a PERM system | Give input from both top down and bottom up,                                    | they will feel engaged, be supportive, understand the challenges, accept, feel confident | Use of a PERM system for MedRec at care transitions, Improved inter-professional relationships | 1, 2, 3, 4, 5, 9, 10,13, 14, 15, 16, 17, 18, 19 |
|                                                                                                              | Have opportunities to give and receive feedback                                 |                                                                                          |                                                                                                |                                                 |
|                                                                                                              | Facilitate role changes to allow work on development and implementation of PERM |                                                                                          |                                                                                                |                                                 |
|                                                                                                              | Take account of users experience in their roles                                 |                                                                                          |                                                                                                |                                                 |
|                                                                                                              | Provide updated reports to users during implementation                          |                                                                                          |                                                                                                |                                                 |
|                                                                                                              | Are provided with a supportive culture within the organisation                  |                                                                                          |                                                                                                |                                                 |
|                                                                                                              | Evaluate at all stages, facilitated by moderators                               |                                                                                          |                                                                                                |                                                 |
|                                                                                                              | Use a user-friendly evaluation feedback tool                                    |                                                                                          |                                                                                                |                                                 |

| Inclusive Design |                                                                   |                                                                                                             |                                                                |                                            |
|------------------|-------------------------------------------------------------------|-------------------------------------------------------------------------------------------------------------|----------------------------------------------------------------|--------------------------------------------|
| If               | Contexts                                                          | Mechanism                                                                                                   | Outcome                                                        | Sources                                    |
| a PERM system is | designed with user input                                          | then users will feel heard and supported, thus fostering successful collaboration, acceptance and increased | use of the PERM system to complete MedRec at care transitions. | 1, 2, 4, 6, 7, 8, 9, 11, 15,16, 17, 18, 19 |
|                  | employs user-centered design & usability principles               |                                                                                                             |                                                                |                                            |
|                  | Takes into account the general level of technology already in use |                                                                                                             |                                                                |                                            |
|                  | Has a balance of Alerts, Warnings, Range of Checks in the system  |                                                                                                             |                                                                |                                            |
|                  | Considers display features                                        |                                                                                                             |                                                                |                                            |
|                  | Considers layout for patients that is different to HCP            |                                                                                                             |                                                                |                                            |
|                  | Keeps steps in the process to a minimum                           |                                                                                                             |                                                                |                                            |
|                  | Deals with Shorthand/ abbreviations                               |                                                                                                             |                                                                |                                            |
|                  | Provides detail info "on demand" to avoid clutter                 |                                                                                                             |                                                                |                                            |
|                  | Terminology: Medication information formatting.                   |                                                                                                             |                                                                |                                            |
|                  | Deal with the complex issues early in the process                 |                                                                                                             |                                                                |                                            |
|                  | Ensures users are happy with pilot versions                       |                                                                                                             |                                                                |                                            |
|                  | Works with real data at pilot stage                               |                                                                                                             |                                                                |                                            |

| PERMs complement existing good processes |                                                                            |                             |               |                 |
|------------------------------------------|----------------------------------------------------------------------------|-----------------------------|---------------|-----------------|
| If                                       | Contexts                                                                   | Mechanism                   | Outcome       | Sources         |
|                                          | Complements cognitive and workflow processes or forms already in existence | the PERM will feel familiar | PERM embedded | 2, 6, 8, 9, 10, |

|                                     |                                                                  |                                                    |                                                                                          |            |
|-------------------------------------|------------------------------------------------------------------|----------------------------------------------------|------------------------------------------------------------------------------------------|------------|
| the MedRec processes or PERM system | The existing MedRec processes are shown to work well             | and consistent, users will feel confident using it | into work practices, a smooth transition, improve MedRec, users cognitive burden reduced | 12, 15, 18 |
|                                     | The quality and performance of the software is acceptable        |                                                    |                                                                                          |            |
|                                     | Caters for complex therapies/odd doses                           |                                                    |                                                                                          |            |
|                                     | Provides an opportunity to list reasons for medications /changes |                                                    |                                                                                          |            |
|                                     | Users are provided with time to get used to the new system       |                                                    |                                                                                          |            |
|                                     | General level of IT already in use                               |                                                    |                                                                                          |            |
|                                     | Takes into consideration the computer skills of users            |                                                    |                                                                                          |            |

| Build Trust |                                                                                     |                                                                       |                                                                                                                                                        |                                              |
|-------------|-------------------------------------------------------------------------------------|-----------------------------------------------------------------------|--------------------------------------------------------------------------------------------------------------------------------------------------------|----------------------------------------------|
| If          | Contexts                                                                            | Mechanism                                                             | Outcome                                                                                                                                                | Sources                                      |
| users       | Are aware how they and others access and use the PERM system                        | their trust and confidence in the system design and use will increase | value and use it at care transitions, improve MedRec and patient safety, improved interprofessional relationships, improved awareness of others' roles | 2, 4, 6, 7, 8, 8, 10, 12, 13, 14, 15, 18, 19 |
|             | Understand the integrity of the PERM data sources, and the data protection controls |                                                                       |                                                                                                                                                        |                                              |
|             | Trust the accuracy of the data                                                      |                                                                       |                                                                                                                                                        |                                              |
|             | Understand the processes or roles of others                                         |                                                                       |                                                                                                                                                        |                                              |
|             | Are aware of how PERM Improves patient safety                                       |                                                                       |                                                                                                                                                        |                                              |
|             | Accept accountability for data entered                                              |                                                                       |                                                                                                                                                        |                                              |
|             | Are aware of others need for/ interest in data                                      |                                                                       |                                                                                                                                                        |                                              |

| Tailored Training                  |                                                                              |                                                          |                                                                     |                                                     |
|------------------------------------|------------------------------------------------------------------------------|----------------------------------------------------------|---------------------------------------------------------------------|-----------------------------------------------------|
| If                                 | Contexts                                                                     | Mechanism                                                | Outcome                                                             | Sources                                             |
| training is provided to users that | Considers their existing MedRec knowledge and skills                         | then feel less anxious and be more engaged and confident | Successful introduction of a PERM system, improved MedRec processes | 1, 2, 3, 4, 6, 7, 8, 10, 12, 13, 14, 15, 16, 18, 19 |
|                                    | Considers their computer skills                                              |                                                          |                                                                     |                                                     |
|                                    | Considers their role and responsibility in the MedRec process                |                                                          |                                                                     |                                                     |
|                                    | Outlines the clear benefits, usefulness and usability of using a PERM system |                                                          |                                                                     |                                                     |
|                                    | Provides time to get used to the new system                                  |                                                          |                                                                     |                                                     |
|                                    | Discussed any previous bad experiences using a PERM system                   |                                                          |                                                                     |                                                     |
|                                    | Provides one to one training if needed                                       |                                                          |                                                                     |                                                     |
|                                    | Gives opportunity to provide feedback on training                            |                                                          |                                                                     |                                                     |

|                                |
|--------------------------------|
| Support and on-demand training |
|--------------------------------|

| If        | Contexts                                                                      | Mechanism                             | Outcome                                                               | Sources                        |
|-----------|-------------------------------------------------------------------------------|---------------------------------------|-----------------------------------------------------------------------|--------------------------------|
| users are | Provided with support and training on MedRec and the PERM system as needed    | users will feel supported and enabled | use the PERM system consistently, improved MedRec at care transitions | 4, 6, 7, 8, 10, 12, 13, 15, 16 |
|           | Provided with one to one training if needed                                   |                                       |                                                                       |                                |
|           | Provided with basic IT training if needed                                     |                                       |                                                                       |                                |
|           | Provided with support and training at times or in formats that suit all users |                                       |                                                                       |                                |
|           | Provided with opportunities to give feedback on the training                  |                                       |                                                                       |                                |
|           | New staff users are provided with support and training                        |                                       |                                                                       |                                |

| Interoperability |                                                  |                                                    |                                                     |                        |
|------------------|--------------------------------------------------|----------------------------------------------------|-----------------------------------------------------|------------------------|
| If               | Contexts                                         | Mechanism                                          | Outcome                                             | Sources                |
| the PERM system  | Has interoperable data sources                   | Feelings of connectivity, alignment and efficiency | improves MedRec process flow, increased use of PERM | 1, 2, 6, 11,12, 16, 19 |
|                  | Allows integration of data from multiple sources |                                                    |                                                     |                        |
|                  | Allows automated data entry                      |                                                    |                                                     |                        |
|                  | Uses drug knowledge databases                    |                                                    |                                                     |                        |

| Resource investment                 |                                                                     |                                               |                                                                                                                         |                      |
|-------------------------------------|---------------------------------------------------------------------|-----------------------------------------------|-------------------------------------------------------------------------------------------------------------------------|----------------------|
| IF                                  | Contexts                                                            | Mechanism                                     | Outcome                                                                                                                 | Sources              |
| leaders/ management / organisations | Recognise the increased effort, volume and quality of data gathered | understand the need for additional resourcing | opportunities for risk identification, management and analysis, improved MedRec at care transitions and patient safety. | 3, 8, 11, 12, 15, 18 |
|                                     | Value the opportunities the additional data provide                 |                                               |                                                                                                                         |                      |
|                                     | Provide sufficient funding from outset                              |                                               |                                                                                                                         |                      |
|                                     | Accurately cost the system                                          |                                               |                                                                                                                         |                      |
|                                     | Can justifying the outlay                                           |                                               |                                                                                                                         |                      |
|                                     | Recognise that improved MedRec increases workload                   |                                               |                                                                                                                         |                      |
|                                     | Recognise the need for additional human and technical resources     |                                               |                                                                                                                         |                      |
|                                     | Recognises the need for continual on the ground support from IT     |                                               |                                                                                                                         |                      |
|                                     | Consider funding for incentivisation                                |                                               |                                                                                                                         |                      |

| Positive impact of Legislation or Governance |          |           |         |         |
|----------------------------------------------|----------|-----------|---------|---------|
| If                                           | Contexts | Mechanism | Outcome | Sources |

|                                                                       |                                                                |                                             |                                                                                    |                                                 |
|-----------------------------------------------------------------------|----------------------------------------------------------------|---------------------------------------------|------------------------------------------------------------------------------------|-------------------------------------------------|
| the introduction of a PERM system or standards for the MedRec process | Are supported by relevant legislation, governance, or policies | organisational participation and engagement | Increased user engagement with a PERM system, improved MedRec at care transitions. | 1, 2, 3, 4, 6, 7, 8, 10, 11, 12, 13, 16, 18, 19 |
|                                                                       | Are considered in a National Strategy                          |                                             |                                                                                    |                                                 |
|                                                                       | Adapt to the adapting roles of the users                       |                                             |                                                                                    |                                                 |
|                                                                       |                                                                |                                             |                                                                                    |                                                 |

| Patients as users of PERMs |                                                        |                                       |                                                                                           |                               |
|----------------------------|--------------------------------------------------------|---------------------------------------|-------------------------------------------------------------------------------------------|-------------------------------|
| If                         | Contexts                                               | Mechanism                             | Outcome                                                                                   | Sources                       |
| patients are supported to  | Use technology and a PERM system                       | Feel enabled, empowered and organised | Maintain accurate medication records, be more informed, improved adherence to medications | 1, 6, 7, 8, 9, 11, 13, 17, 19 |
|                            | Understand their medical conditions                    |                                       |                                                                                           |                               |
|                            | Understand the purpose of their medications            |                                       |                                                                                           |                               |
|                            | Record their medication use on a PERM system           |                                       |                                                                                           |                               |
|                            | Share their medication information using a PERM system |                                       |                                                                                           |                               |
