# Supplementary material for: Personal Electronic Records of Medications (PERMs) for Medication Reconciliation at Care Transitions: A Rapid Realist Review
Source: Research Square preprint supplement (doi:10.21203/rs.3.rs-289394/v1), 2021-03-15
Supplement: Supplementary file [file a1f589f2cec9d38dd1442c99.pdf]

### Additional File 6: Template for summary of study document

|                                         |               |                        |                                 |                 |
|-----------------------------------------|---------------|------------------------|---------------------------------|-----------------|
| Author                                  | Article Title |                        | Year                            | Type of Article |
|                                         |               |                        |                                 |                 |
| Country:                                |               | Ethics:                |                                 |                 |
| Relevance (to topic):                   |               | Rigour (study design): | Richness (quality of data 0-4): |                 |
| Justification:                          |               | Justification:         | Justification:                  |                 |
| Research Question                       |               |                        |                                 |                 |
| Formal Outcomes                         |               |                        |                                 |                 |
| Study Conclusions                       |               |                        |                                 |                 |
| Any Theory/Concept outlined or inferred |               |                        |                                 |                 |
| Software in use                         |               |                        |                                 |                 |
| Setting – (Hospital, Nursing Home etc)  |               |                        |                                 |                 |
| Personnel involved                      |               |                        |                                 |                 |
| Themes Identified                       |               |                        |                                 |                 |
| Forward/Backward References             |               |                        |                                 |                 |

### Codes for Quality Assessment:

Relevance Rating: (0-3) 0= very weak, 1 = weak, 2 = good, 3 = very good

Rigour Rating: (0-3) 0 = very poor, 1= poor, 2 = good, 3 = very good

Richness Rating: (0-4) 0 = nothing of interest, not focused on D, I or Use, 1 = limited data of interest, likely to appear in other articles, 2 = limited data of interest, but quick to extract it and could add weight to findings, 3 = Some good quality data, 4 = Valuable data
